# Supplementary material for: Soil Organic Matter Persistence as a Stochastic Process: Age and Transit Time Distributions of Carbon in Soils
Source: PubMed Central journal article supplement — Global Biogeochem Cycles. 2018 Oct 26;32(10):1574–88. doi: 10.1029/2018GB005950 (PMC6472657; doi:10.1029/2018gb005950), 2018-10-26
Supplement: GBC-32-1574-s001.pdf [file GBC-32-1574-s001.pdf]

**Supplementary material for  
Soil organic matter persistence as a stochastic process:  
age and transit time distributions of carbon in soils**

**Carlos A. Sierra<sup>1</sup>, Alison Hoyt<sup>1</sup>, Yujie He<sup>2</sup>, Susan E. Trumbore<sup>1</sup>**

<sup>1</sup>Max Planck Institute for Biogeochemistry, Hans-Knöll-Str. 10, 07745 Jena, Germany  
<sup>2</sup>Department of Earth System Science, University of California, Irvine, USA

---

Corresponding author: C.A. Sierra, [csierra@bgc-jena.mpg.de](mailto:csierra@bgc-jena.mpg.de)

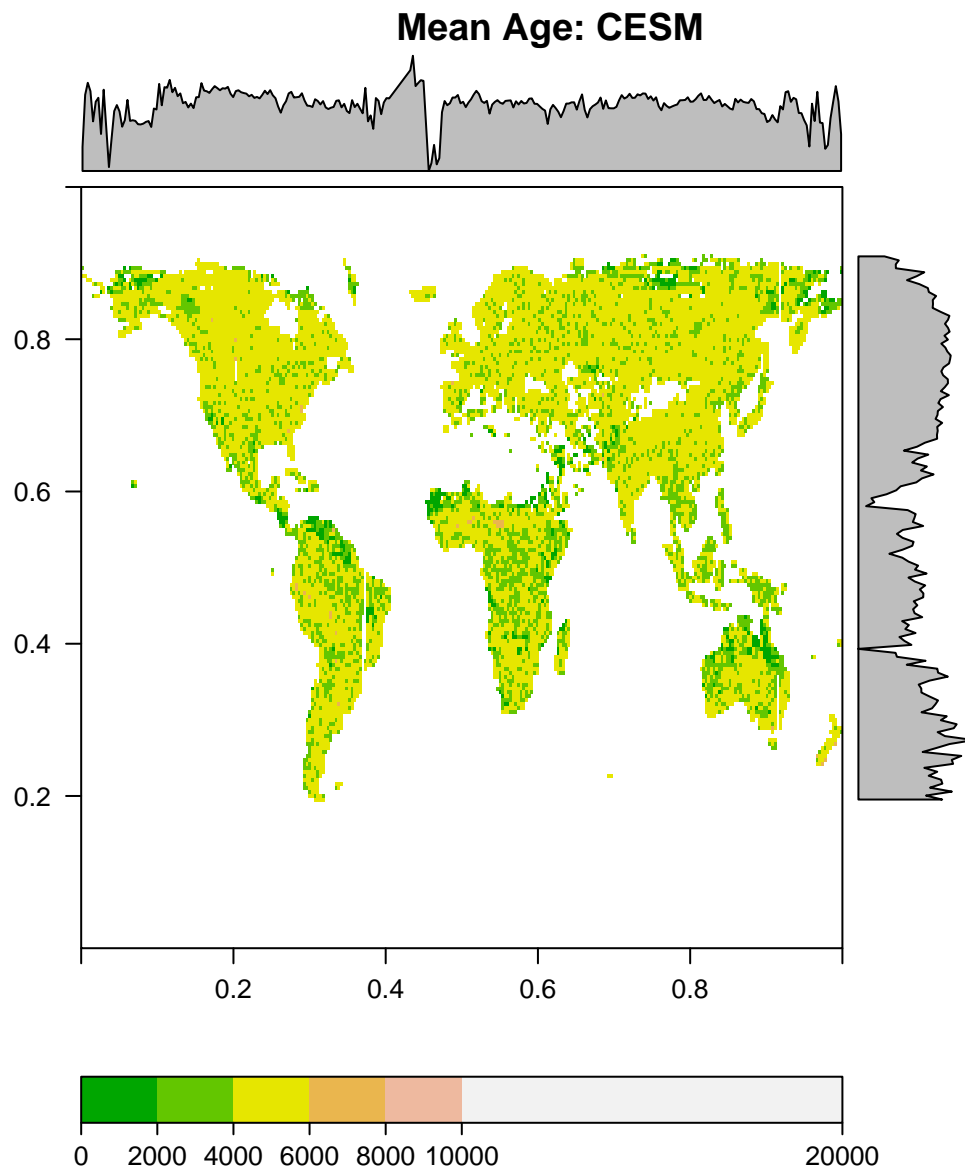

**Figure 1.** Mean age of the reduced complexity model CESM calculated for each grid cell.

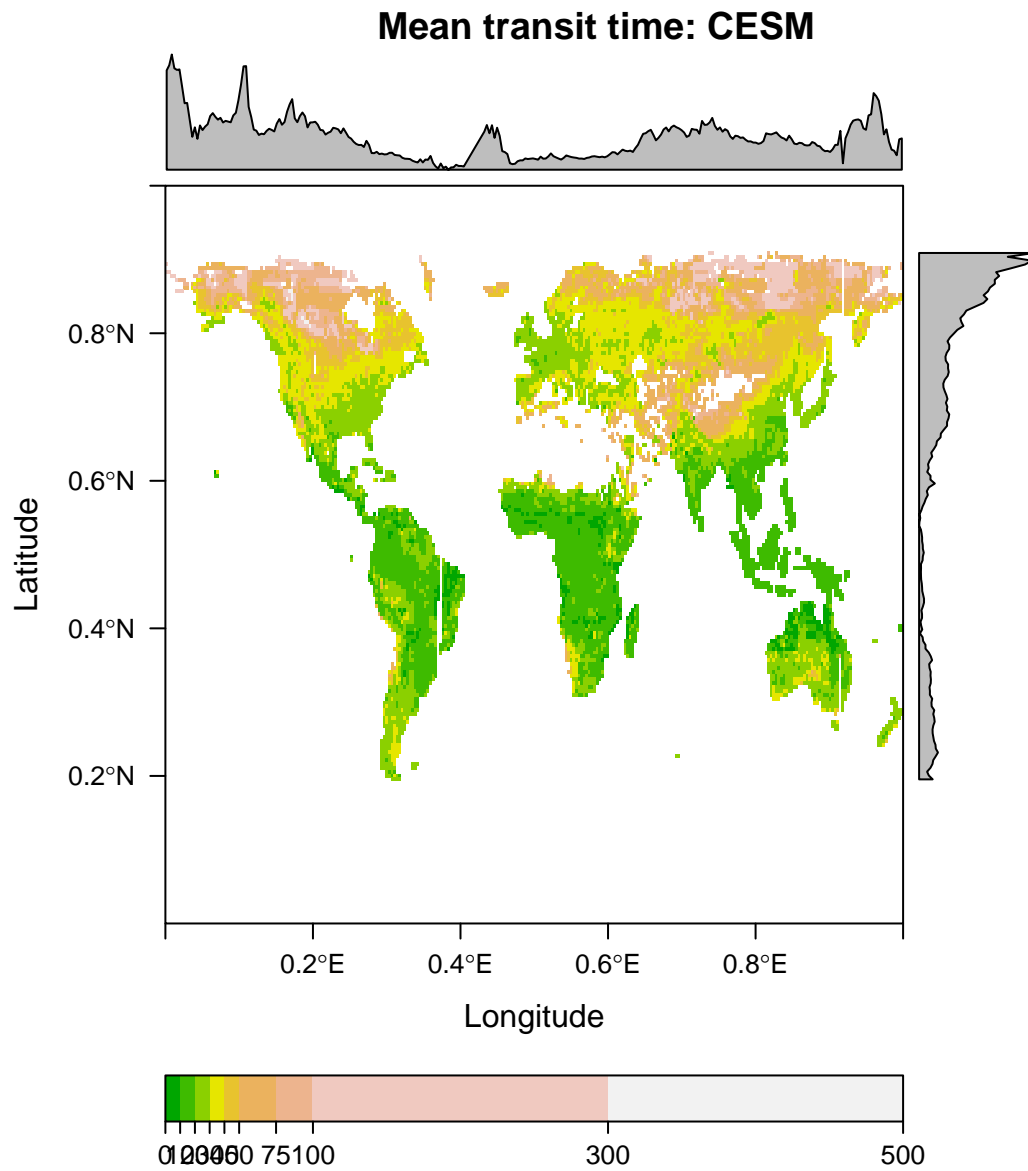

**Figure 2.** Mean transit time of the reduced complexity model CESM calculated for each grid cell.

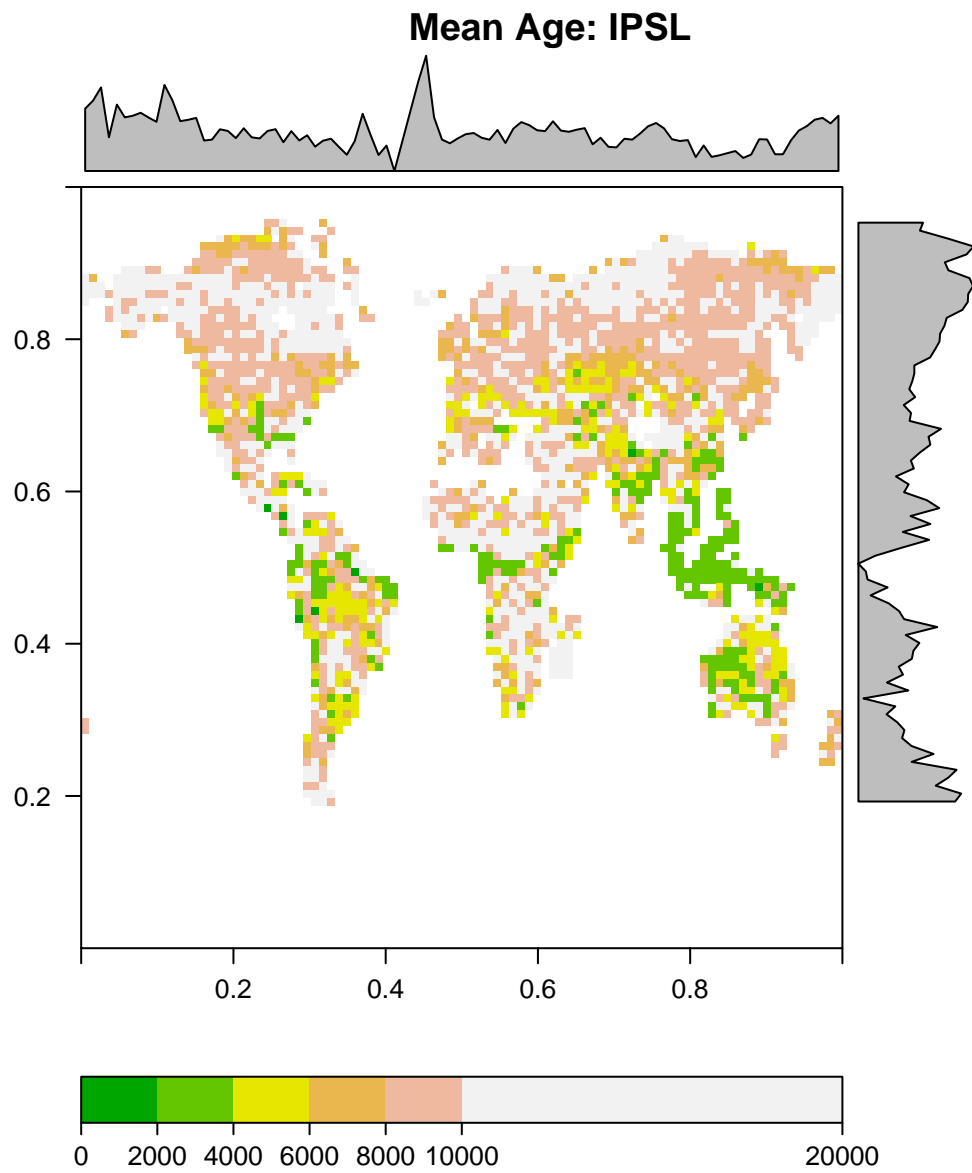

**Figure 3.** Mean age of the reduced complexity model IPSL calculated for each grid cell.

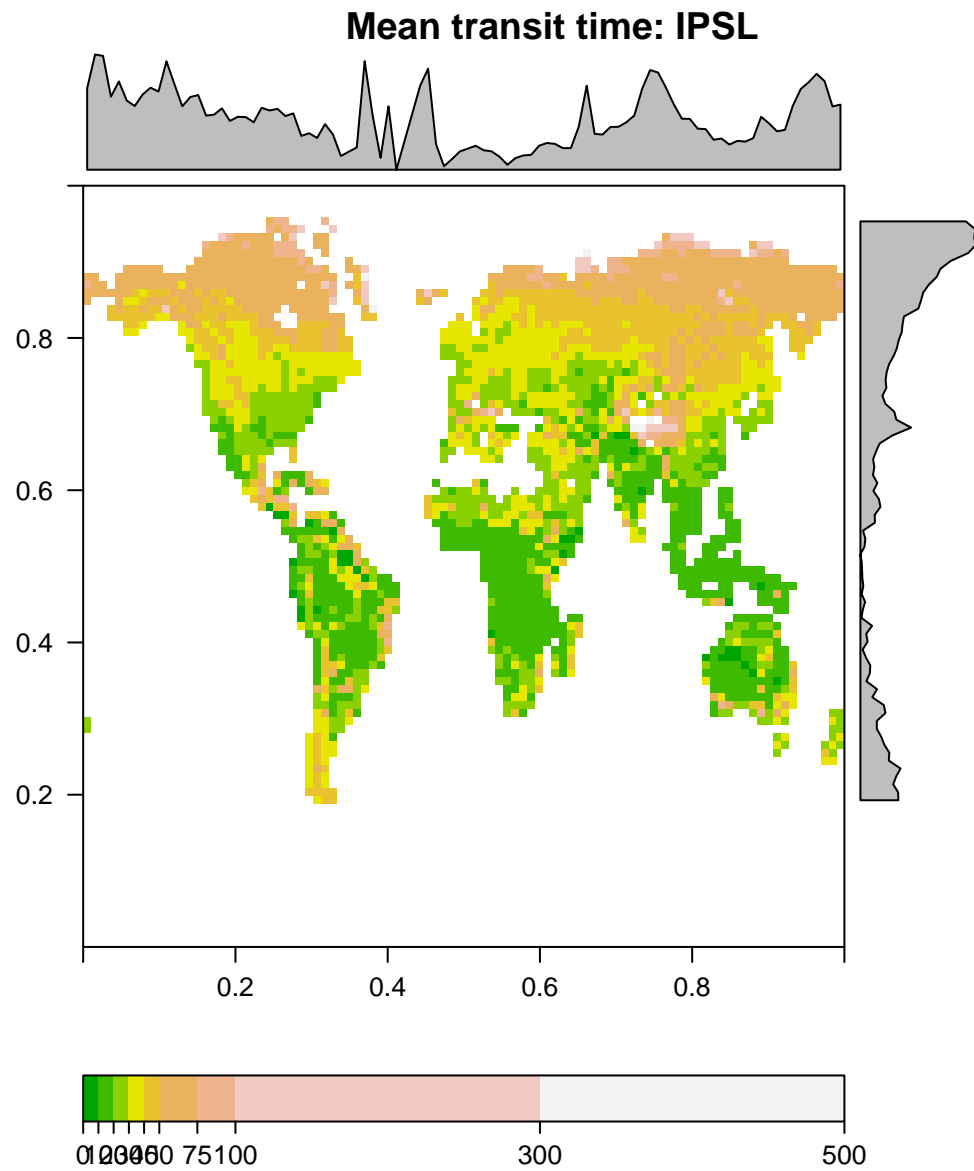

**Figure 4.** Mean transit time of the reduced complexity model IPSL calculated for each grid cell.

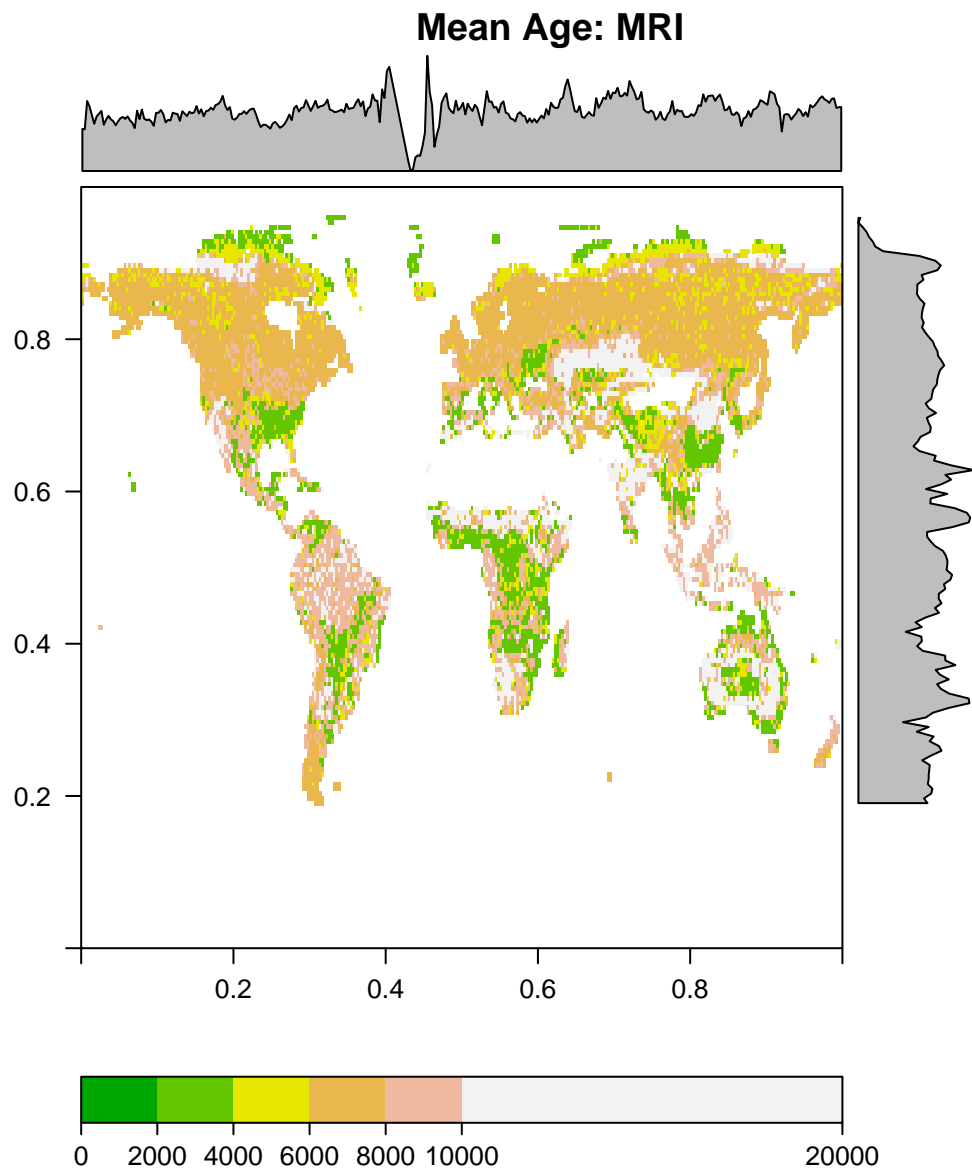

**Figure 5.** Mean age of the reduced complexity model MRI calculated for each grid cell.

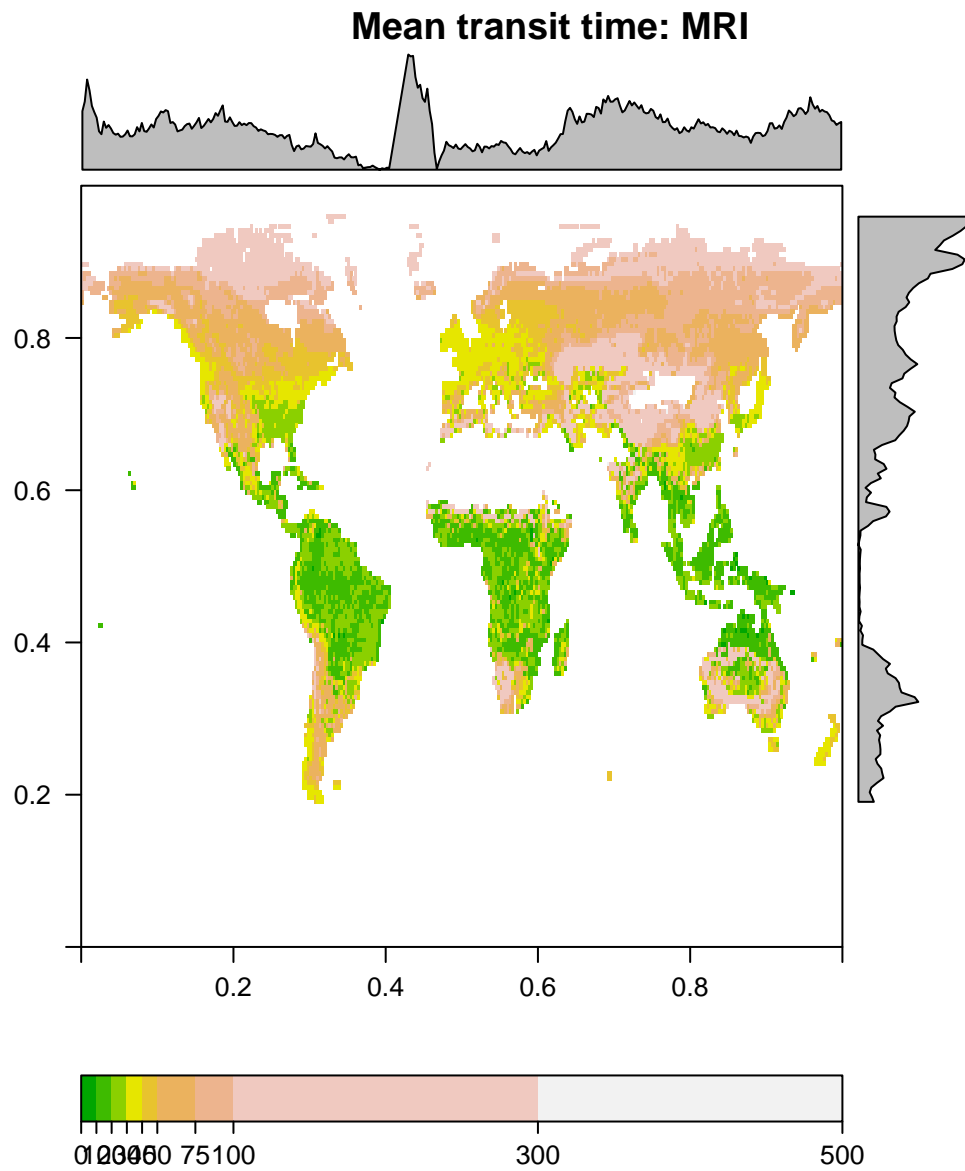

**Figure 6.** Mean transit time of the reduced complexity model MRI calculated for each grid cell.

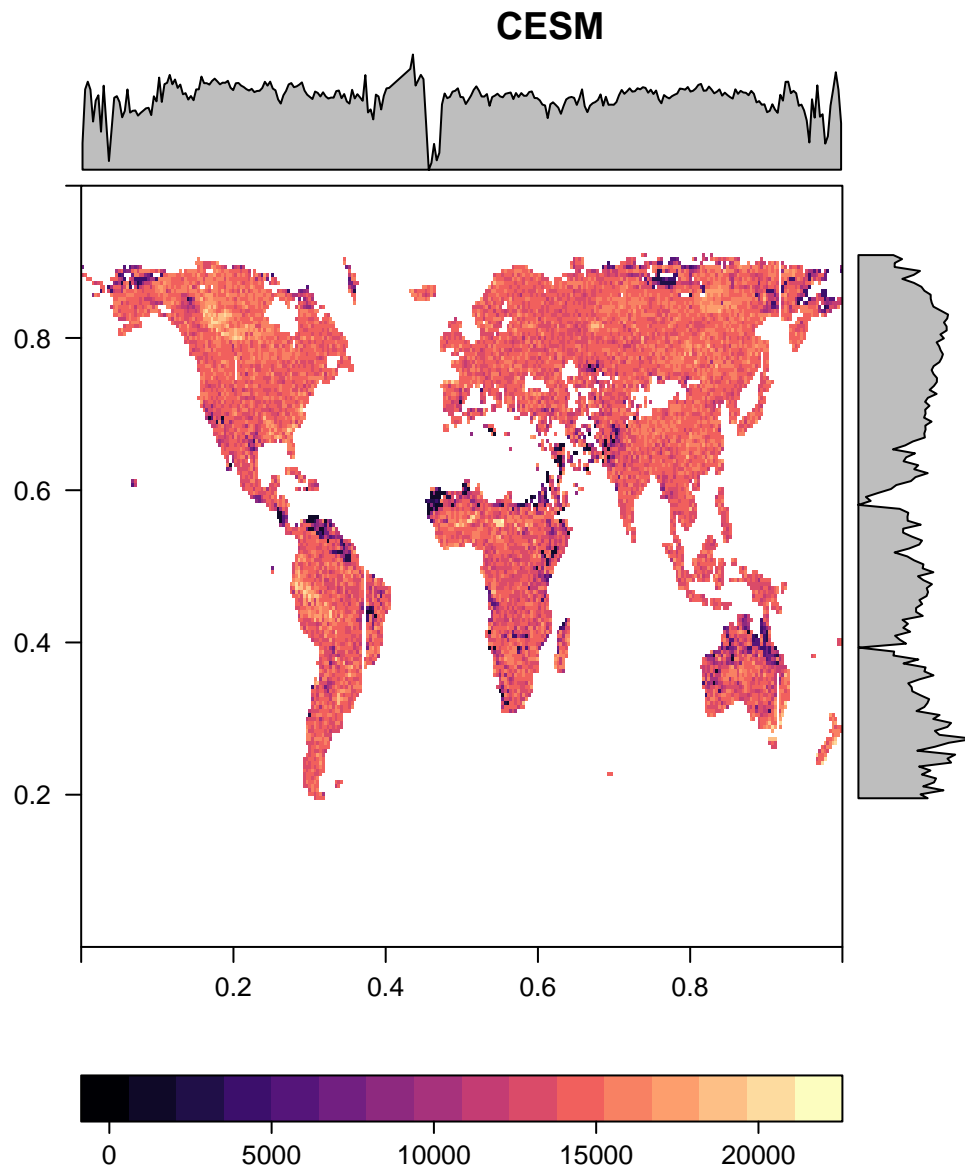

**Figure 7.** 95% quantile of the age distribution calculated for the reduced complexity version of the CESM model.



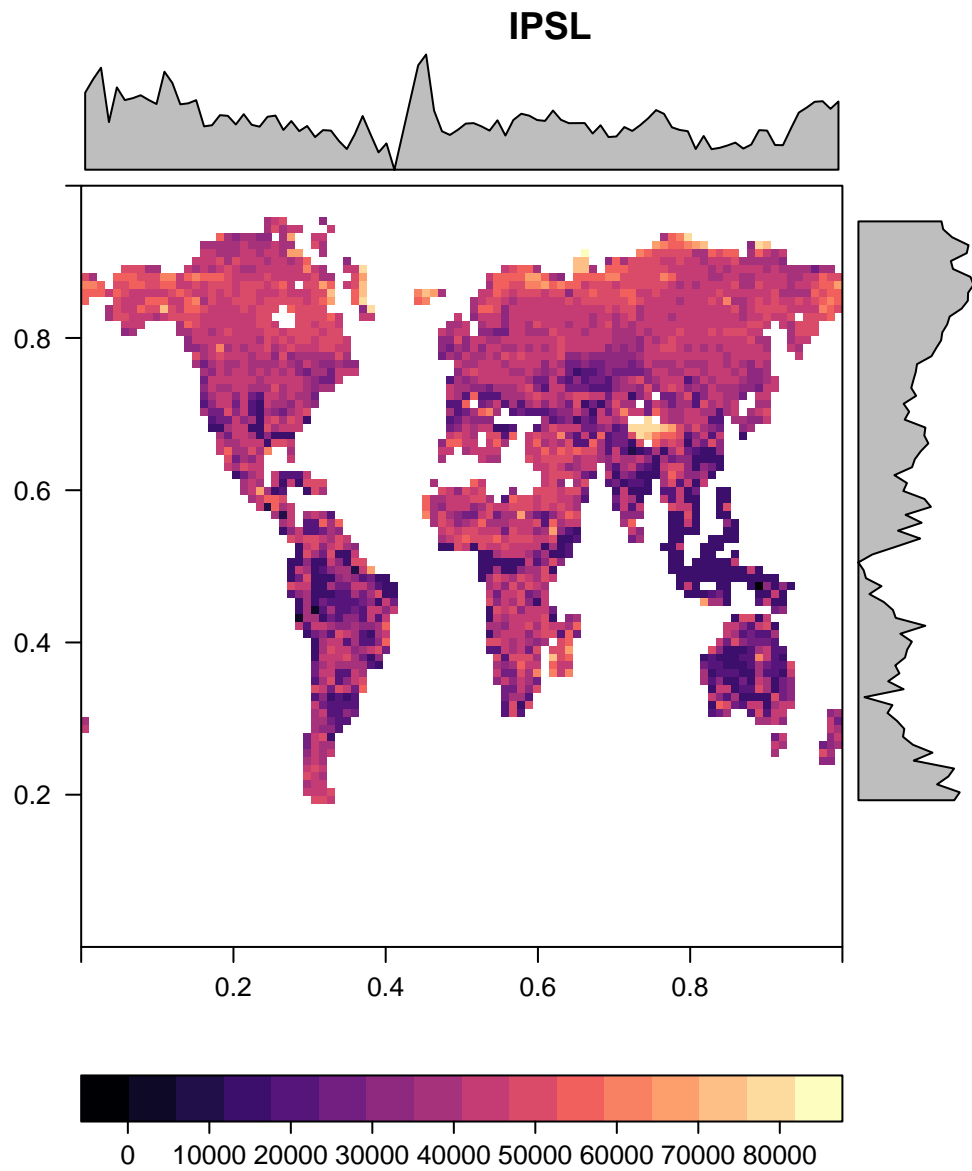

**Figure 8.** 95% quantile of the age distribution calculated for the reduced complexity version of the IPSL model.

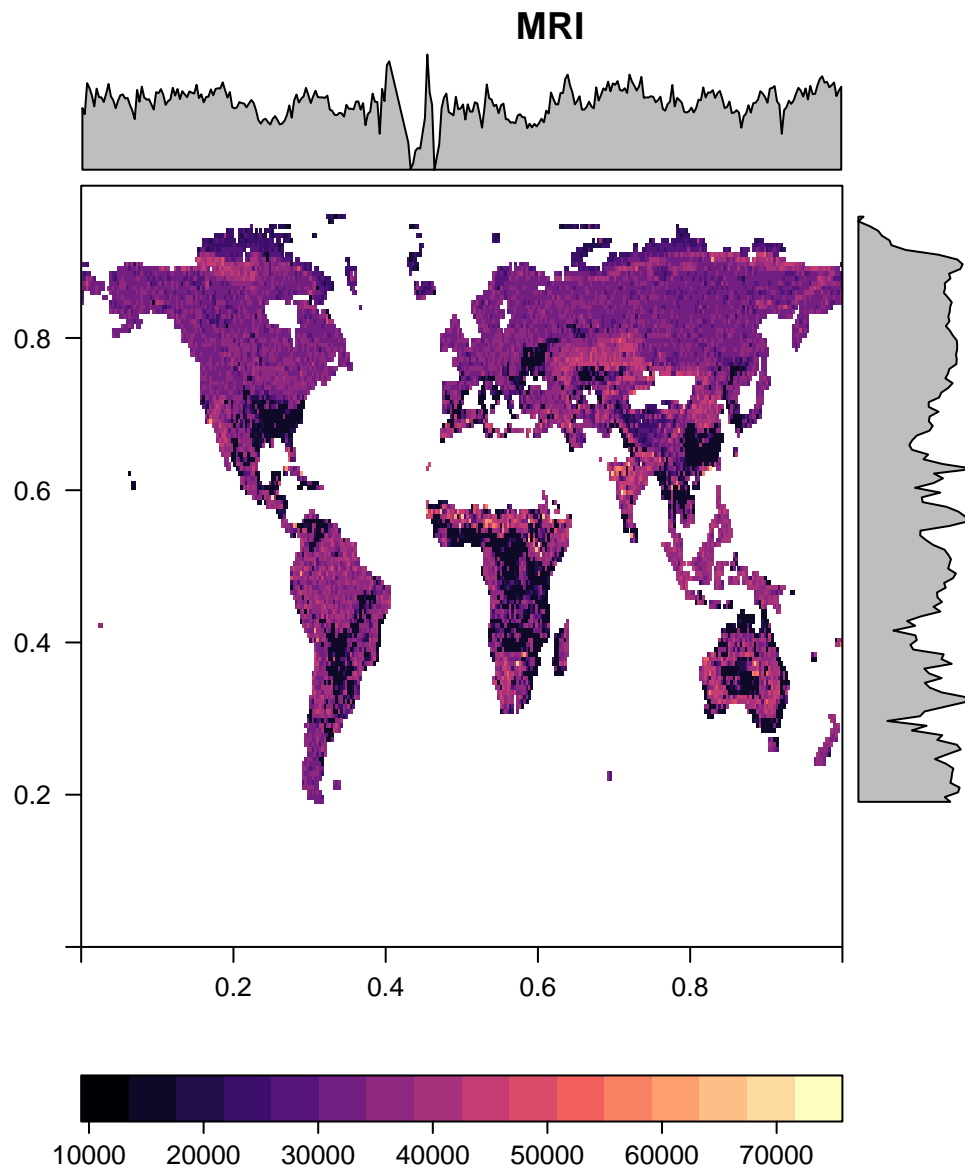

**Figure 9.** 95% quantile of the age distribution calculated for the reduced complexity version of the MRI model.

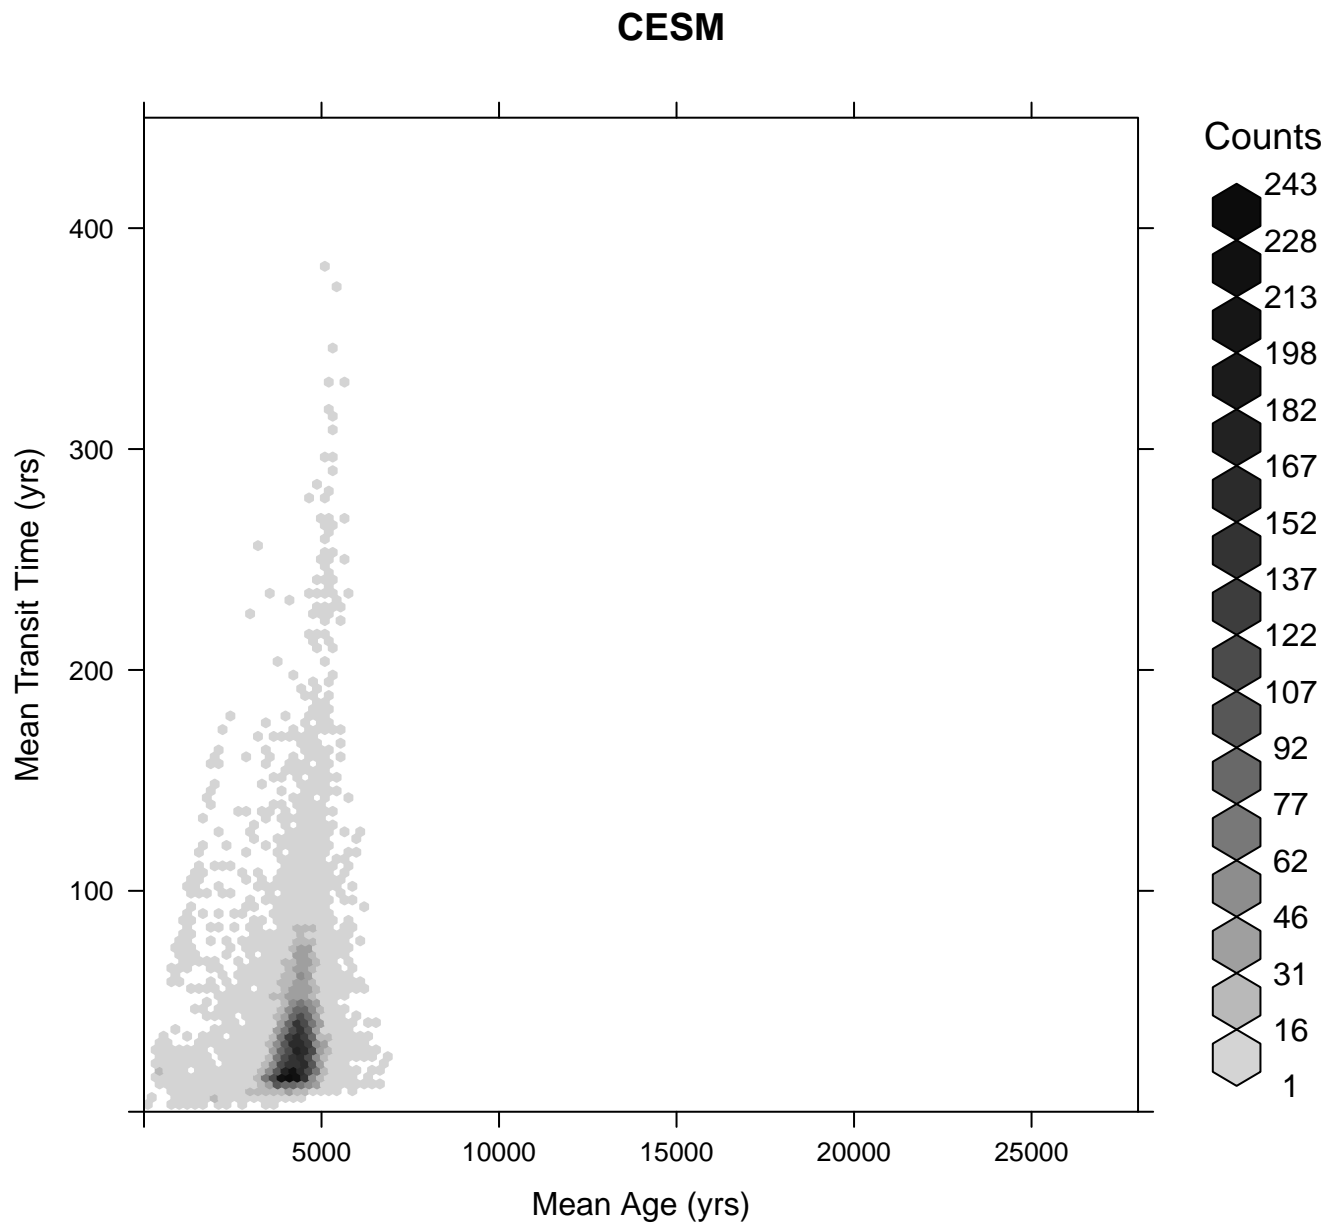

**Figure 10.** Hexbin plot showing the relation between mean age and mean transit time for the CESM model. Darker colors are indicative of a larger number of grid cells with similar values.

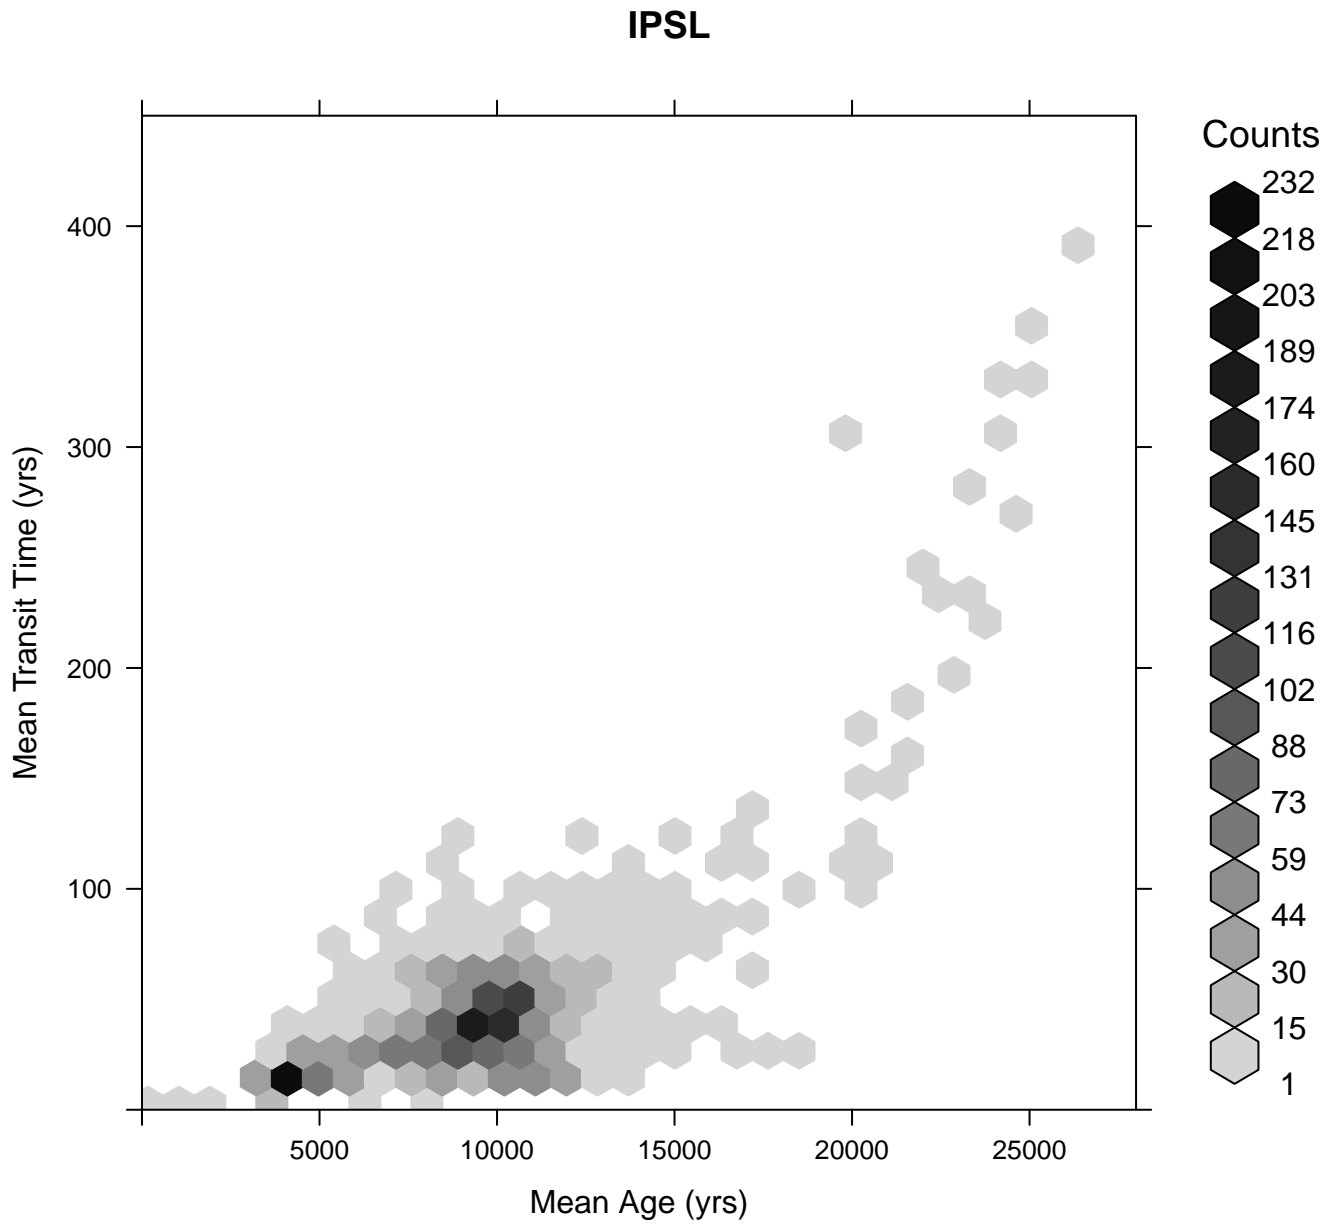

**Figure 11.** Hexbin plot showing the relation between mean age and mean transit time for the IPSL model. Darker colors are indicative of a larger number of grid cells with similar values.

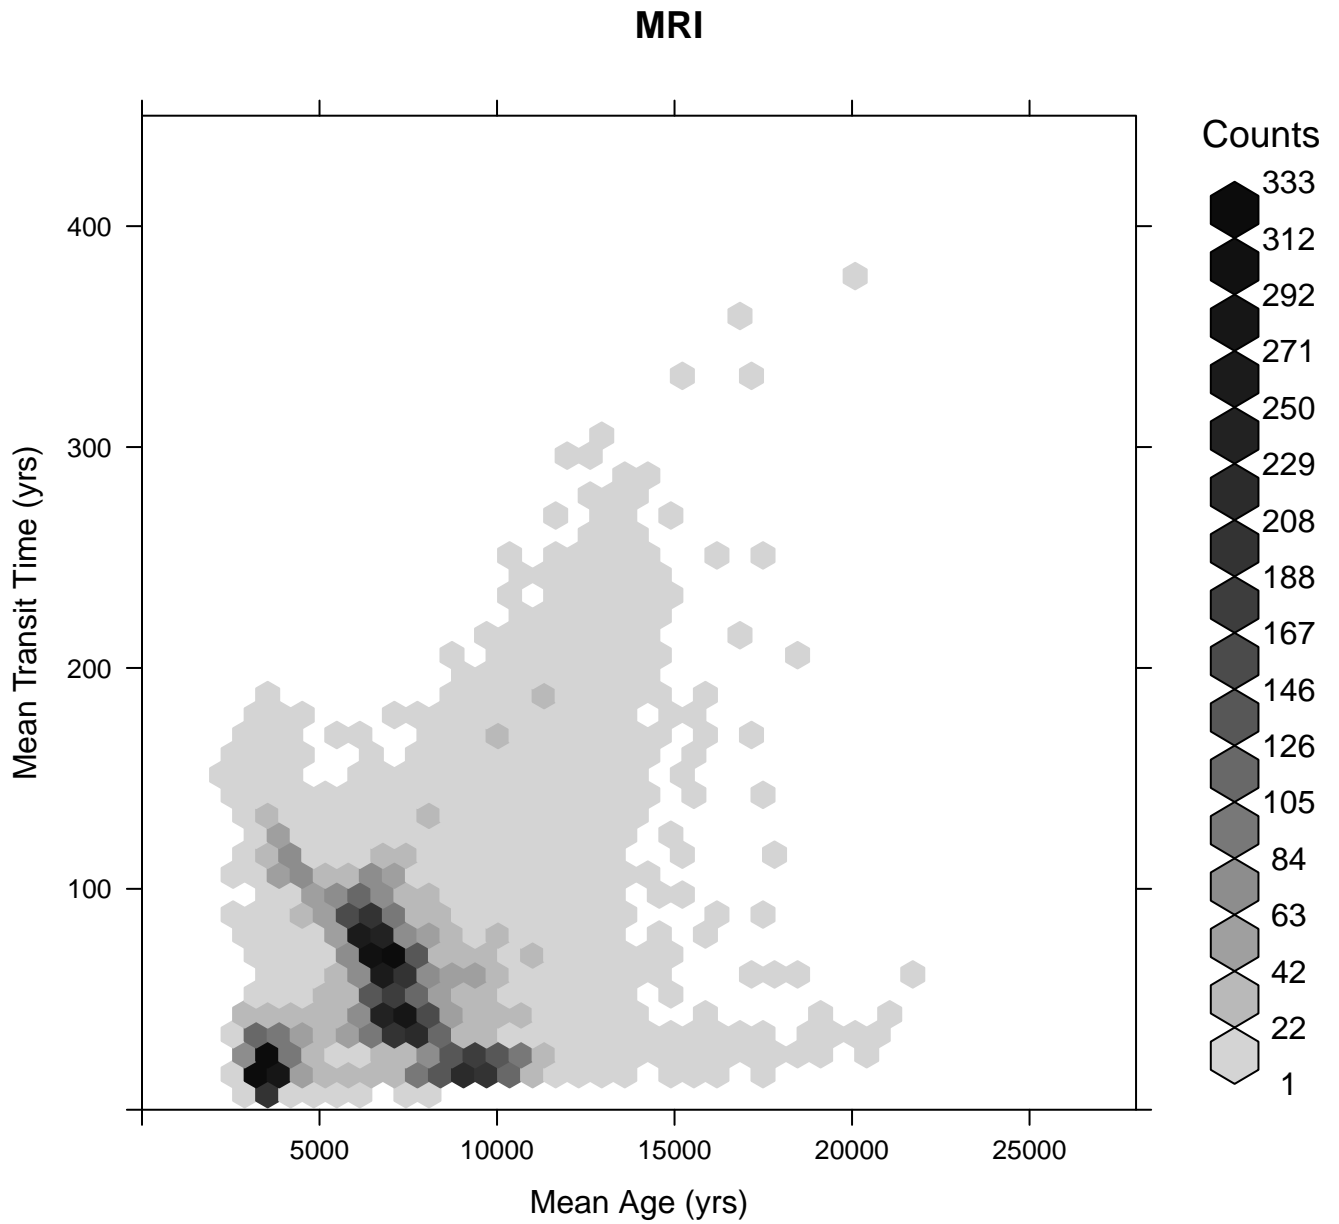

**Figure 12.** Hexbin plot showing the relation between mean age and mean transit time for the MRI model. Darker colors are indicative of a larger number of grid cells with similar values.

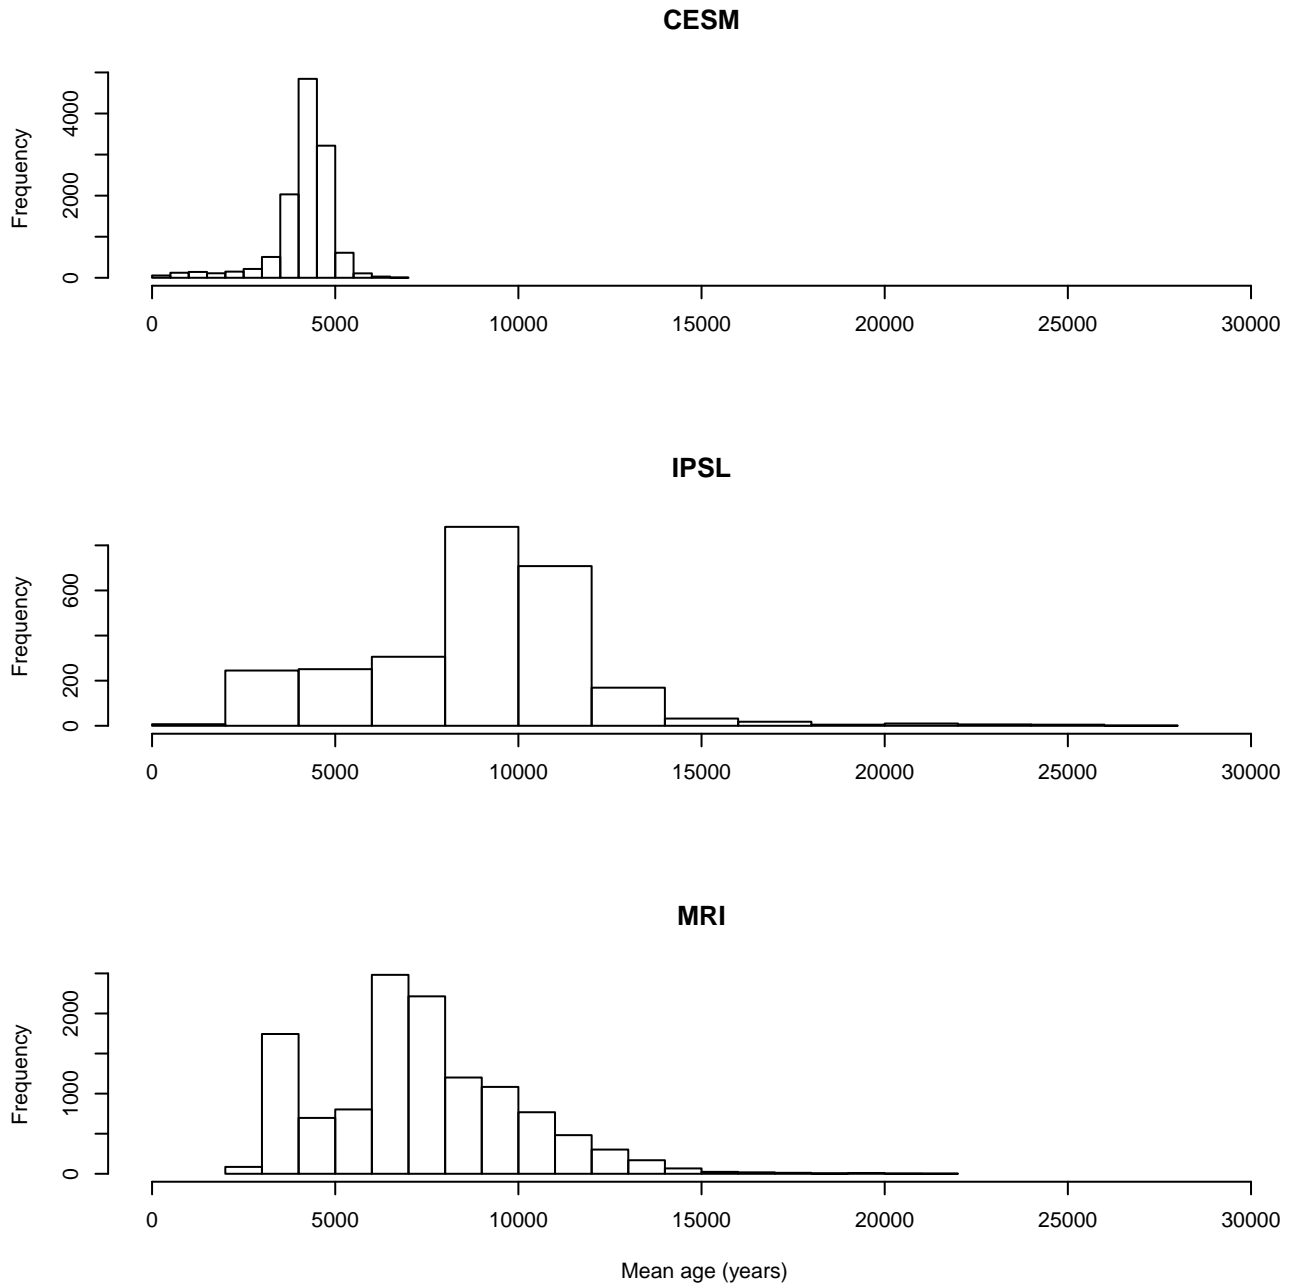

**Figure 13.** Histogram of mean ages for all models

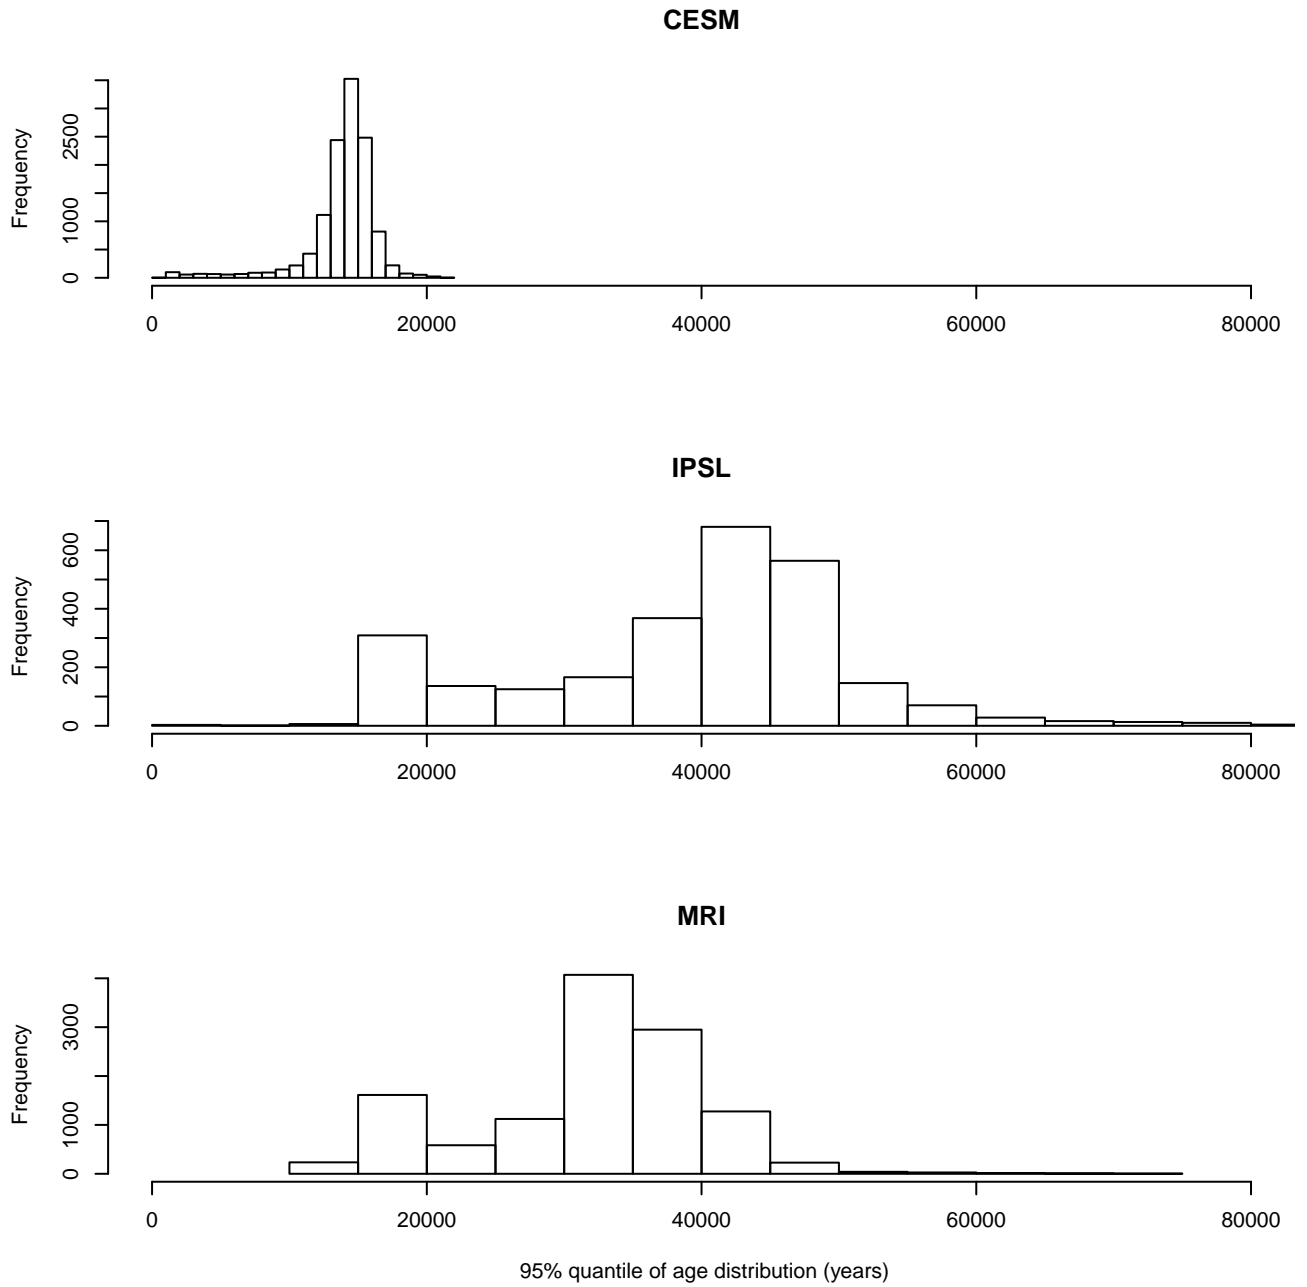

**Figure 14.** Histogram of 95% quantiles of the age distribution for all models
